# Supplementary material for: Modulation of biomineralization morphology by phosphorylated collagen peptides: insights into osteogenesis imperfecta pathophysiology
Source: Royal Society of Chemistry journal article supplement (doi:10.1039/d4tb00873a), 2024-01-01
Supplement: d4tb00873a1.pdf [file d4tb00873a1.pdf]

## Supporting Materials

### Modulation of Biomineralization Morphology by Phosphorylated Collagen Peptides: Insights into Osteogenesis Imperfecta Pathophysiology

Linge Nian,<sup>a,b</sup> Wenhua Li,<sup>a</sup> Xinyu Tian,<sup>a</sup> Guochen Wei,<sup>a</sup> Qingfeng Wu<sup>c</sup>, Jianxi Xiao<sup>\*a</sup>

<sup>a</sup> State Key Laboratory of Applied Organic Chemistry, College of Chemistry and Chemical Engineering, Lanzhou University, Lanzhou 730000, P. R. China

<sup>b</sup> School of Life Sciences, Lanzhou University, Lanzhou 730000, P. R. China

<sup>c</sup> Institute of Modern Physics, Chinese Academy of Sciences, Lanzhou 730000, P. R. China.

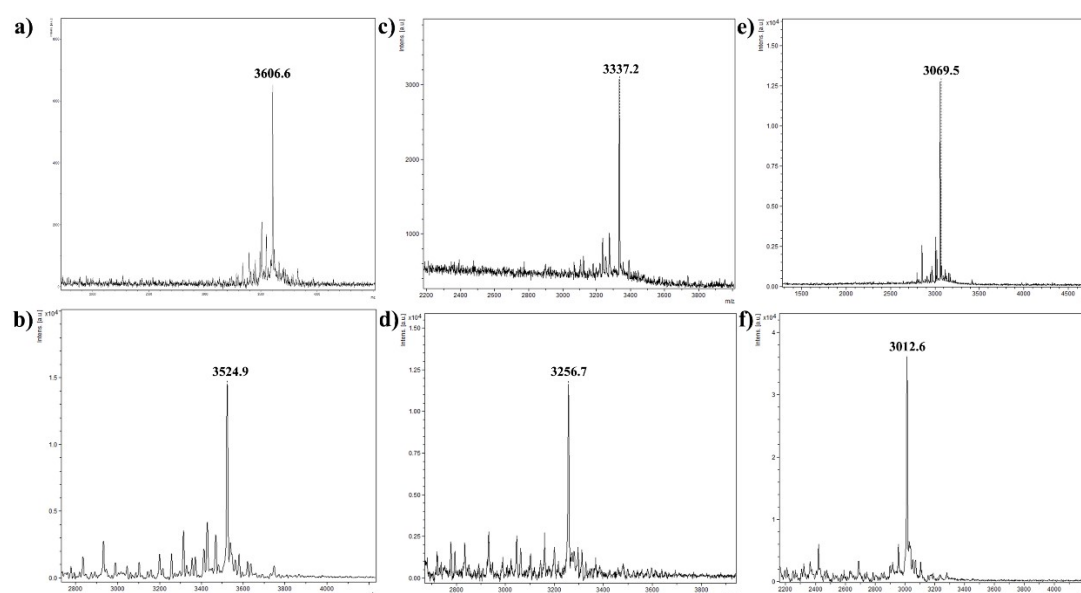

**Figure S1.** The mass spectrometry of GPO<sub>13</sub>pS (a), GPO<sub>13</sub>S (b), GPO<sub>12</sub>pS (c), GPO<sub>12</sub>S (d), GPO<sub>11</sub>pS (e), and GPO<sub>11</sub>S (f).

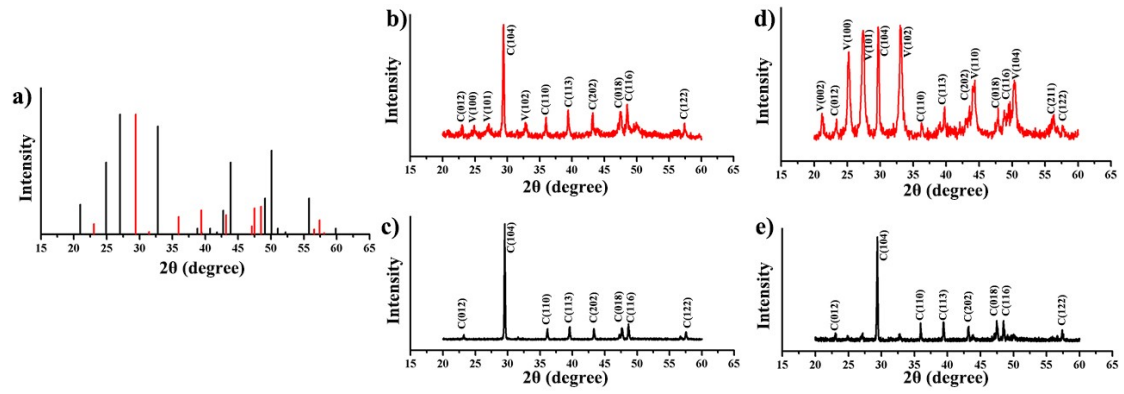

**Figure S2.** XRD characterization of the synthesized collagen peptide-calcium carbonate nanomaterials. (a) XRD patterns of the standard vaterite (JCPDS no. 72-506) (black) and calcite (JCPDS no. 24-27) (red). XRD patterns of GPO<sub>12</sub>pS-CaCO<sub>3</sub> (b), GPO<sub>12</sub>S-CaCO<sub>3</sub> (c), GPO<sub>11</sub>pS-CaCO<sub>3</sub> (d), and GPO<sub>11</sub>S-CaCO<sub>3</sub> (e).

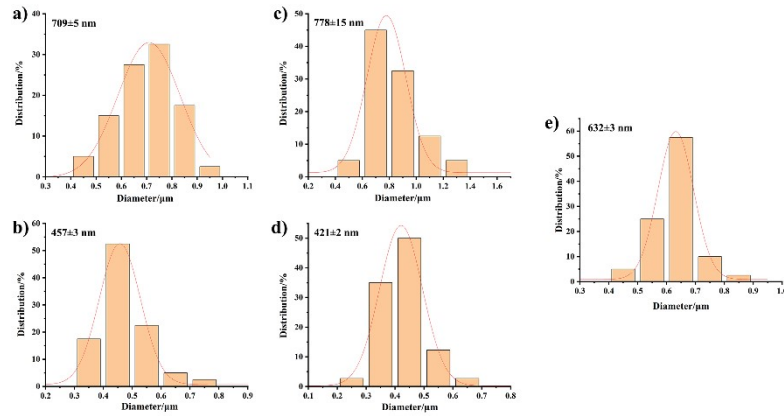

**Figure S3.** The average particle sizes of peptide-based CaCO<sub>3</sub> nanomaterials. The length (a) and width (b) of GPO<sub>13</sub>pS-CaCO<sub>3</sub>, the length (c) and width (d) of GPO<sub>12</sub>pS-CaCO<sub>3</sub>, and diameter (e) of GPO<sub>11</sub>pS-CaCO<sub>3</sub>.

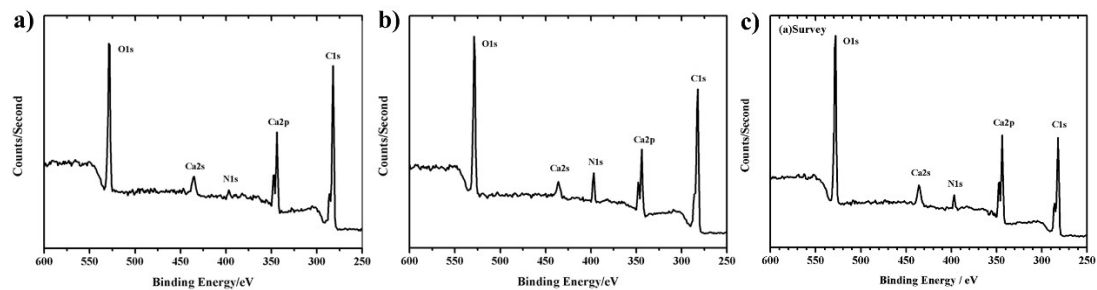

**Figure S4.** The XPS of GPO<sub>13</sub>S-CaCO<sub>3</sub> (a), GPO<sub>12</sub>pS-CaCO<sub>3</sub> (b), GPO<sub>11</sub>pS-CaCO<sub>3</sub> (c).

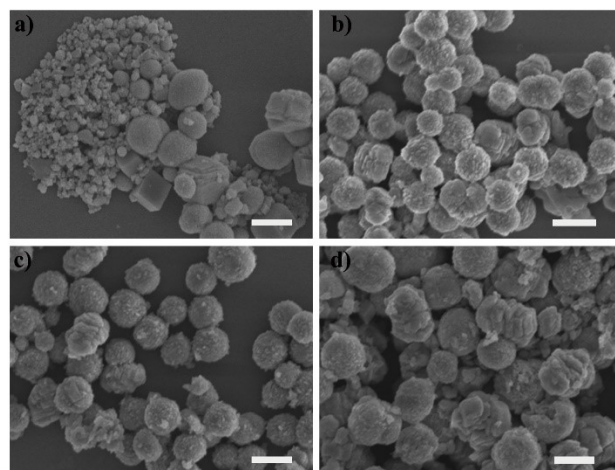

**Figure S5.** FESEM images of the GPO<sub>11</sub>pS-CaCO<sub>3</sub> nanomaterials prepared at different incubation times: 5 min (a), 1 h (b), 2 h (c), and 24 h (d). The mixture of GPO<sub>11</sub>pS (2 mM), sodium carbonate (40 mM), and calcium chloride (40 mM) was incubated at 25 °C. Scale bar=1  $\mu$ m.

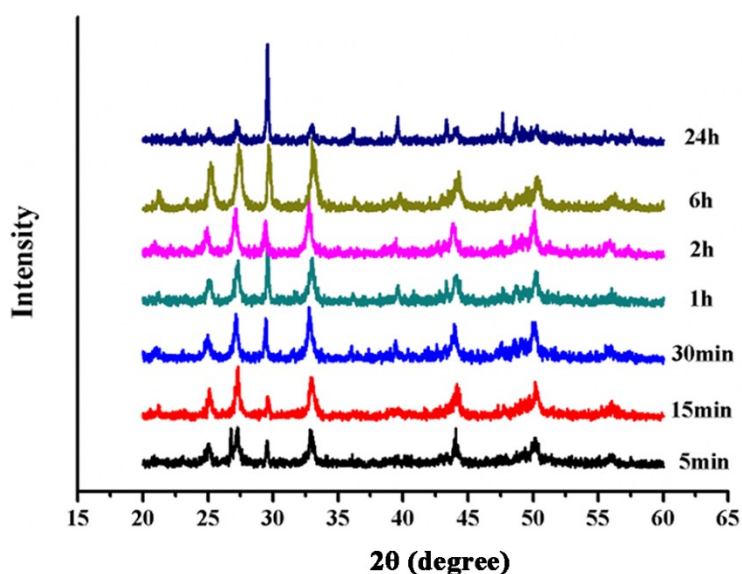

**Figure S6.** The XRD patterns of the GPO<sub>11</sub>pS-CaCO<sub>3</sub> nanomaterials prepared at different incubation times: 5 min, 15 min, 30 min, 1 h, 2 h, 6 h, and 24 h.

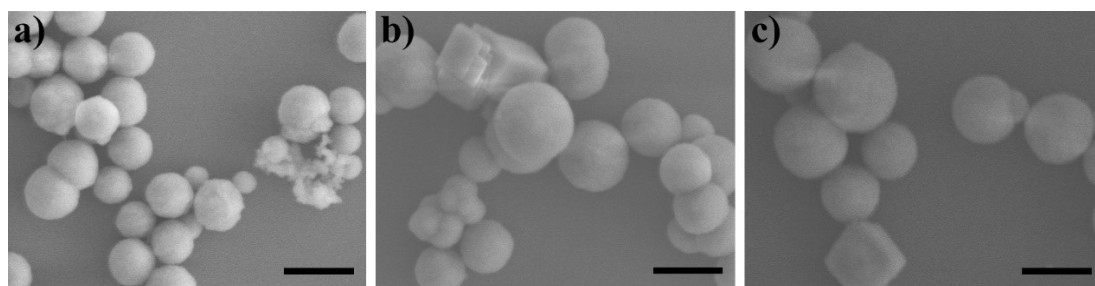

**Figure S7.** The SEM images of GPO<sub>11</sub>pS-CaCO<sub>3</sub> (a), GPO<sub>12</sub>pS-CaCO<sub>3</sub> (b), and GPO<sub>13</sub>pS-CaCO<sub>3</sub> (c) corresponding to preheated peptide GPO<sub>11</sub>pS, GPO<sub>12</sub>pS and GPO<sub>13</sub>pS, respectively. Scale bar=1  $\mu$ m.
